# Supplementary material for: HTLV-1 modulates the frequency and phenotype of FoxP3+CD4+ T cells in virus-infected individuals
Source: PubMed Central journal article supplement (PMC3403885; doi:10.1186/1742-4690-9-46), 2012-05-30

Figure S1

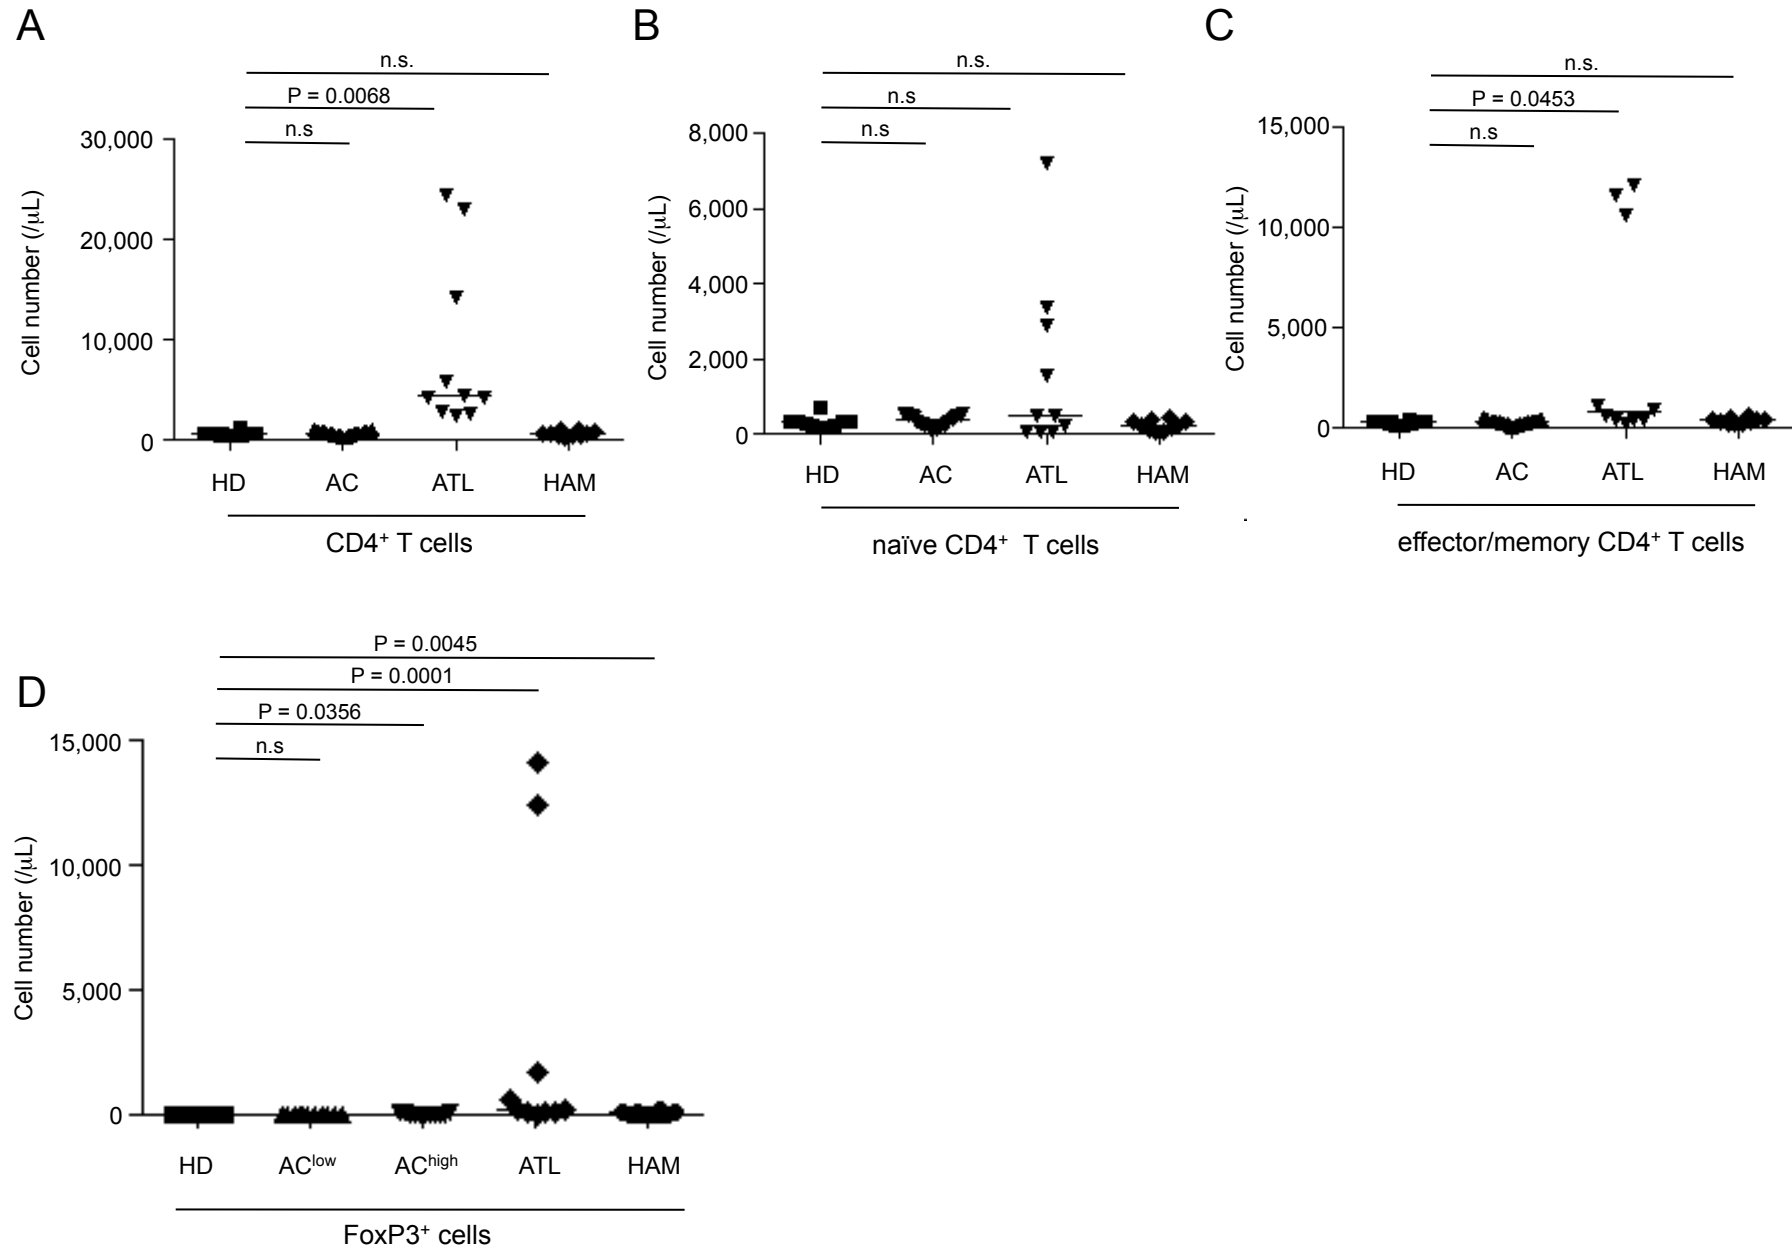

Supplement: 1742-4690-9-46-S1.pdf [file 1742-4690-9-46-S1.pdf]
